# Supplementary material for: Densely cross-linked polysiloxane dielectric for organic thin-film transistors with enhanced electrical stability
Source: Royal Society of Chemistry journal article supplement (doi:10.1039/c8tc06236f), 2019-01-01
Supplement: c8tc06236f1.pdf [file c8tc06236f1.pdf]

Electronic Supplementary Information

## **Densely cross-linked polysiloxane dielectric for organic thin-film transistors with enhanced electrical stability**

Joo-Young Kim,<sup>a,b‡</sup> Eun Kyung Lee,<sup>a‡</sup> Jiyoung Jung,<sup>a</sup> Don-Wook Lee,<sup>a</sup> Youngjun Yun,<sup>a</sup>  
Jong Won Chung,<sup>a</sup> Jeong-Il Park,<sup>a</sup> and Jang-Joo Kim<sup>\*b</sup>

<sup>a</sup>Material Research Center, Samsung Advanced Institute of Technology (SAIT), Samsung Electronics, Suwon, Gyeonggi-do 16678, Republic of Korea

<sup>b</sup>Department of Materials Science and Engineering, Seoul National University, Seoul 08826, Republic of Korea

Joo-Young Kim and Eun Kyung Lee contributed equally to this work.

### **Corresponding Author**

\*Jang-Joo Kim (jjkim@snu.ac.kr)

**Table S1** Summarized characteristics of organic-inorganic hybrid dielectrics and performance of the devices fabricated employing them as gate dielectric in literature

| Dielectric Material                                                             | Process condition | Thickness | <sup>1</sup> J-V range | <sup>2</sup> k | Active layer                            | SAM                        | Mobility                                                      | Hysteresis | <sup>3</sup> $\Delta V_{Th}$ | Ref. |
|---------------------------------------------------------------------------------|-------------------|-----------|------------------------|----------------|-----------------------------------------|----------------------------|---------------------------------------------------------------|------------|------------------------------|------|
|                                                                                 |                   | (nm)      | (MV cm <sup>-1</sup> ) |                |                                         |                            | (cm <sup>2</sup> V <sup>-1</sup> s <sup>-1</sup> )            | (V)        | (V)                          |      |
| 3-methacryloxypropyltrimethoxysilane and zirconium propoxide                    | 170 °C            | 190 - 265 | 2                      | 5.5            | <sup>a</sup> DH $\alpha$ 4T             | -                          | 1.0 $\times$ 10 <sup>-3</sup>                                 | N/A        | N/A                          | 23   |
| DPSD (diphenylsilanediol) and MPTMS (3-(Trimethoxysilyl)propyl methacrylate)    | 150°C, UV         | 40        | 3                      | 3.1            | Pentacene                               | -                          | 0.3                                                           | Negligible | N/A                          | 24   |
| Anthryl-terminated alkyl-phosphonic acid on UV cured sol-gel HfOx               | 200°C, UV         | 4.8       | 2                      | -              | Pentacene / <sup>b</sup> TIPS-Pentacene | <sup>g</sup> PA derivative | 0.32 / 0.38                                                   | Negligible | N/A                          | 25   |
| PMSQ (poly(methyl silsesquioxane))                                              | 150°C             | 450       | 3                      | 3.6            | <sup>c</sup> P3HT                       | -                          | 7.1 $\times$ 10 <sup>-3</sup>                                 | Negligible | on, -1 V (1,000 s)           | 26   |
| ZrCl4 and $\alpha,\omega$ -disilylalkane                                        | 150°C, Vacuum     | 20 - 43   | 2                      | 5 - 10         | Pentacene                               | -                          | 0.1 - 1.6                                                     | Negligible | N/A                          | 27   |
| Solution based ZrO <sub>2</sub> (zirconium-(IV) acetylacetonate as a precursor) | UV                | 5 - 6     | 3                      | ~10            | <sup>d</sup> PBTTC-C14                  | <sup>h</sup> ODPA          | 0.2                                                           | N/A        | N/A                          | 28   |
| Cyclotetrasiloxane and melamine                                                 | 80°C              | 400       | 1                      | 3.79           | Pentacene                               | -                          | 0.36                                                          | 3.3        | N/A                          | 29   |
| ZrTA (zirconium tetraacrylate)                                                  | 120°C             | 50 - 60   | 2                      | 5.48           | Pentacene                               | -                          | 0.5                                                           | Negligible | N/A                          | 30   |
| PPMSQ (poly(phenyl-co-methacryl silsesquioxane))                                | 200°C             | 920 - 980 | 1                      | 3.1 - 3.6      | Pentacene / <sup>e</sup> PTCDI-C8       | -                          | 0.53 / 0.17                                                   | N/A        | N/A                          | 31   |
| PMMS (poly[(mercaptopropyl)methyl-siloxane])                                    | R.T               | 1,000     | 2                      | 5.4            | <sup>f</sup> DPP-DTT / Pentacene        | -                          | 5.5 $\times$ 10 <sup>-2</sup> / 1.3 $\times$ 10 <sup>-3</sup> | Negligible | on/off, ~3 V (10,000 s)      | 32   |
| LPSQ-TMS (trimethylsilyl-capped hybrid ladder-like polysilsesquioxane)          | 110°C             | 500       | 2                      | -              | Pentacene                               | -                          | 0.6                                                           | Negligible | N/A                          | 33   |
| poly(azomethine) containing the isobutyl-substituted T8 cages                   | 100°C             | -         | N/A                    | -              | P3HT                                    | -                          | 4.3 $\times$ 10 <sup>-3</sup>                                 | Negligible | N/A                          | 34   |

<sup>1</sup>Range of electric field applied for evaluating dielectric strength reported (leakage current), <sup>2</sup>dielectric constant <sup>3</sup>Shift of threshold voltage under the on/off bias stress condition

<sup>a</sup> $\alpha,\omega$ -Dihexylquaterthiophene, <sup>b</sup> 6,13-bis(triisopropyl-silylethynyl) pentacene, <sup>c</sup>poly(3-hexylthiophene-2,5-diyl), <sup>d</sup>Poly(2,5-bis(3-tetradecylthiophen-2yl)(thieno[3,2-b]thiophene),

<sup>e</sup>N,N'-dioctyl-3,4,9,10-perylenedicarboximide, <sup>f</sup>Diketopyrrolopyrrole-dithiophene-thienothiophene, <sup>g</sup>anthryl-terminated alkyl-phosphonic acid, <sup>h</sup>octadecylphosphonic acid

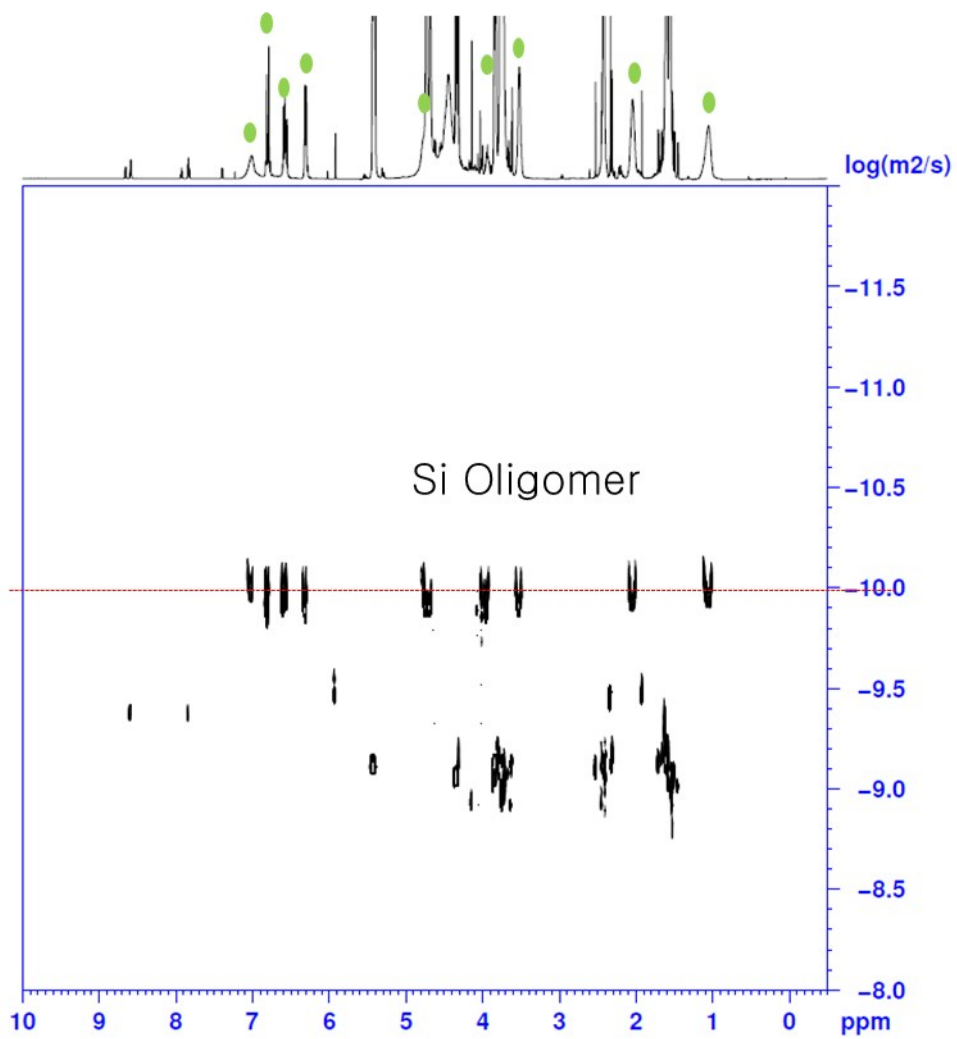

Fig. S1 2D-DOSY NMR of PSUA Solution

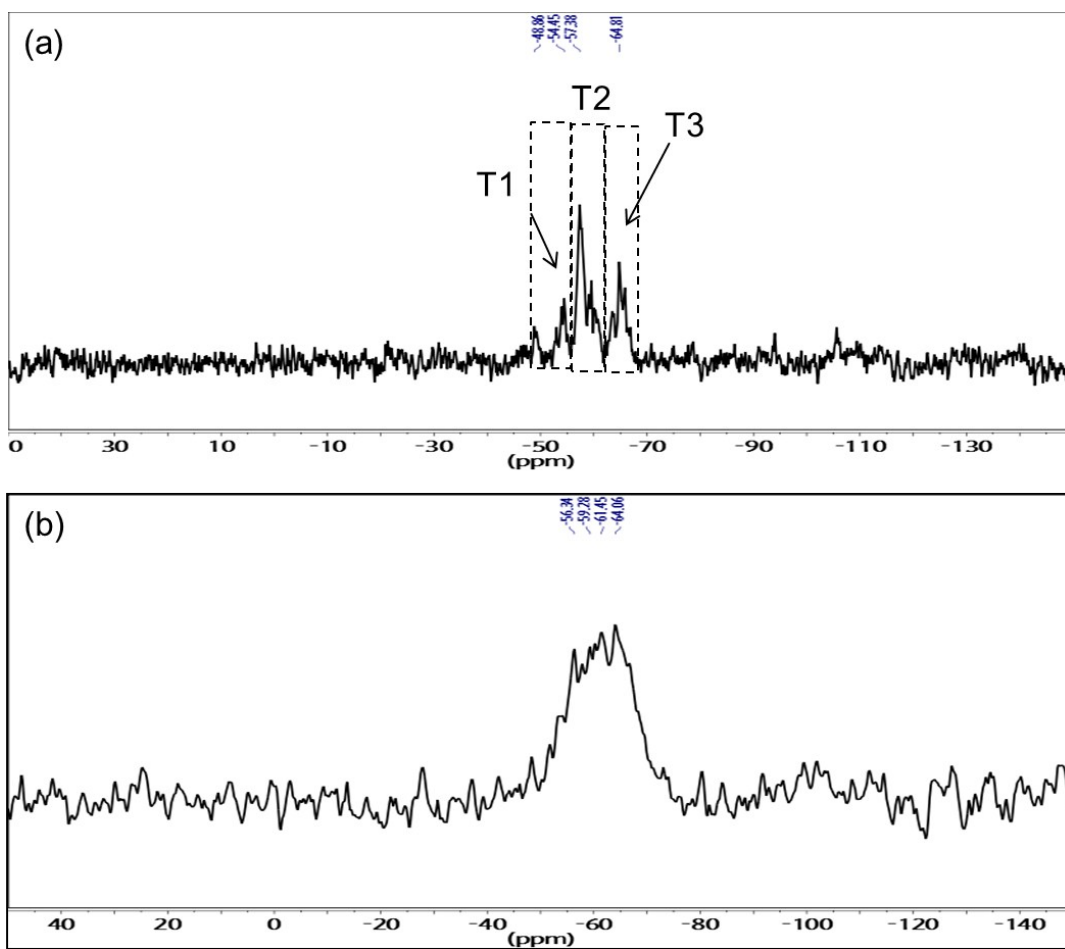

**Fig. S2** (a)  $^{29}\text{Si}$  NMR of PSUA solution (oligomer)  
(b)  $^{29}\text{Si}$  CP-MAS NMR of cross-linked PSUAC thin-film (solid)

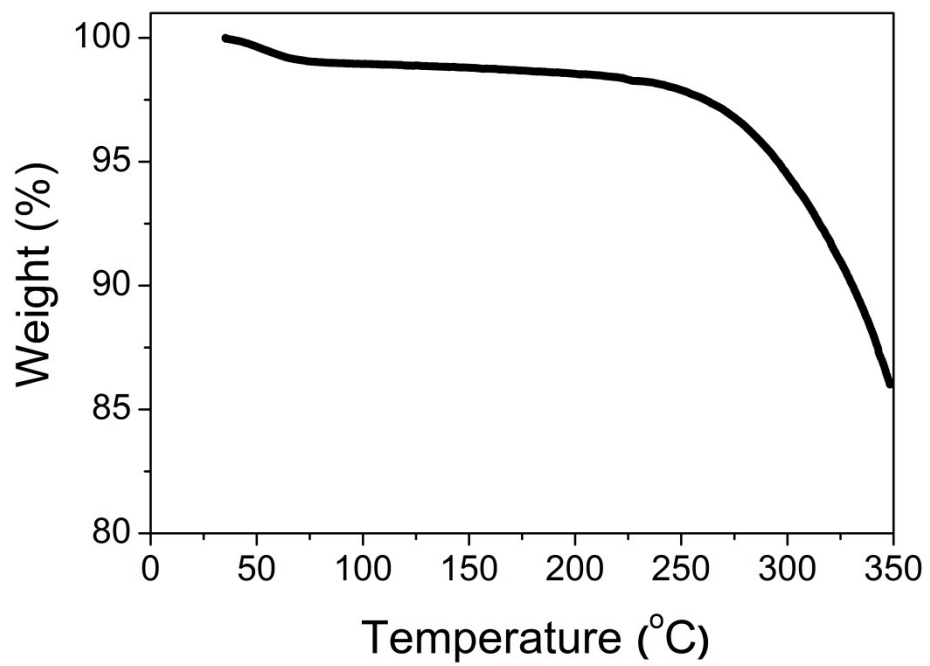

**Fig. S3** TGA of cross-linked PSUAC thin-film

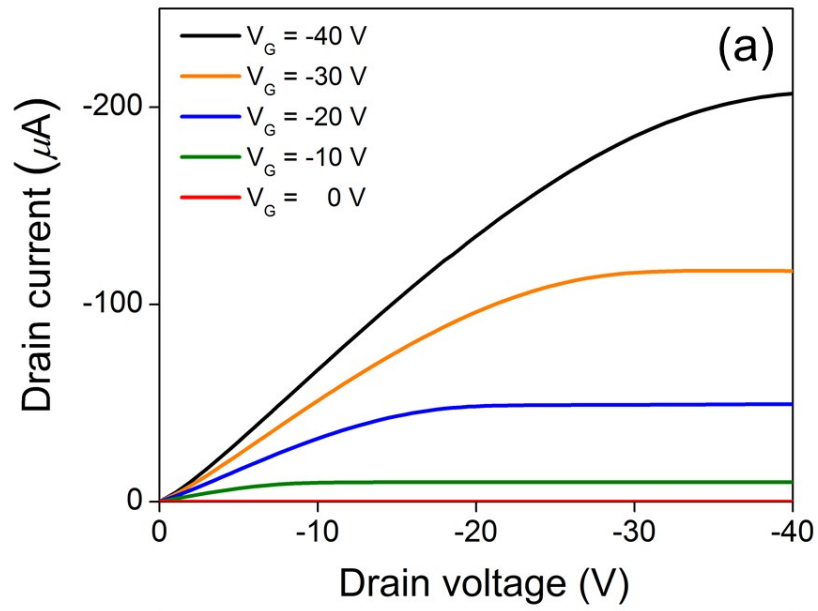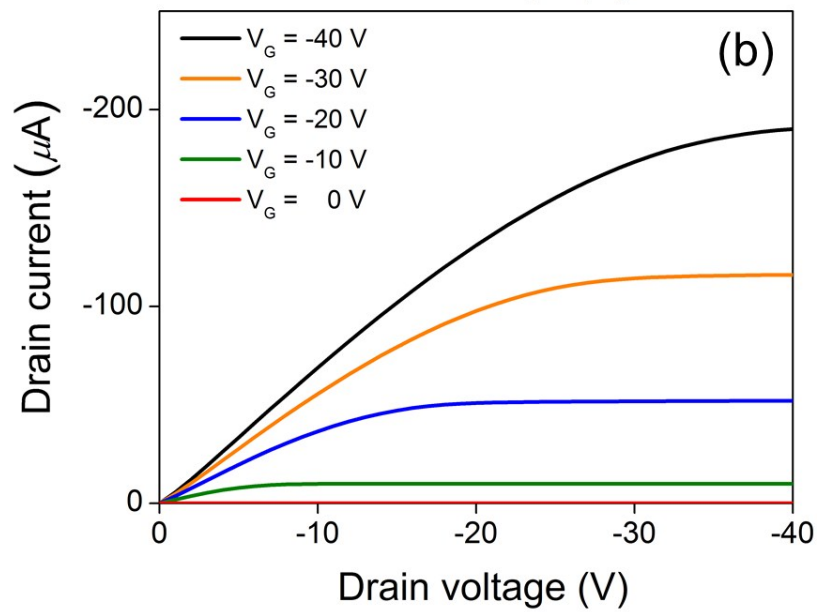

**Fig. S4** Output curves of DBTTT TFTs fabricated on  
(a) PSUAC (b) PECVD  $\text{SiO}_2$

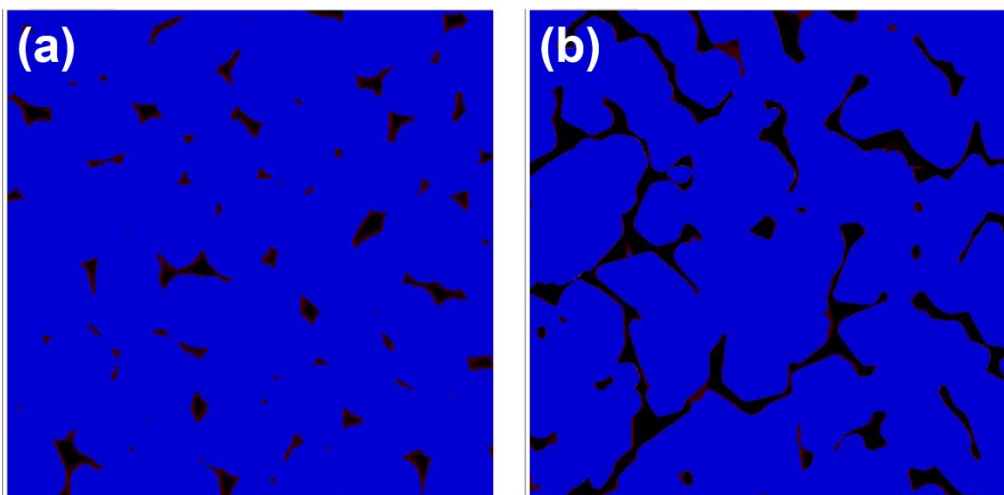

**Fig. S5** AFM image analysis of DBTTT morphologies deposited on  
(a) PSUAC (b) PECVD SiO<sub>2</sub>
